# Supplementary material for: Radiolytic evaluation of a new technetium redox control reagent for advanced used nuclear fuel separations
Source: Royal Society of Chemistry journal article supplement (doi:10.1039/d3cp04987f), 2024-01-01
Supplement: d3cp04987f1.pdf [file d3cp04987f1.pdf]

## Supplementary Information: Radiolytic evaluation of a new technetium redox control reagent for advanced used nuclear fuel separations

Anh N. Dang,<sup>a</sup> Maya H. Rogalski,<sup>a</sup> Corey D. Pilgrim,<sup>b</sup> Joseph R. Wilbanks,<sup>b</sup> Dean R. Peterman,<sup>b</sup> Jesse D. Carrie,<sup>b</sup> Peter R. Zalupski,<sup>b</sup> Stephen P. Mezyk,<sup>a\*</sup> and Gregory P. Horne,<sup>b\*</sup>

<sup>a</sup> Department of Chemistry and Biochemistry, California State University Long Beach, 1250 Bellflower Boulevard, Long Beach California, 90840-9507, USA

<sup>b</sup> Center for Radiation Chemistry Research, Idaho National Laboratory, Idaho Falls, ID, P.O. Box 1625, 83415, USA.

\*Corresponding authors. E-mail: [stephen.mezyk@csulb.edu](mailto:stephen.mezyk@csulb.edu) and [gregory.holmbeck@inl.gov](mailto:gregory.holmbeck@inl.gov).

### ADDITIONAL CHEMICAL KINETICS

#### HYDRATED ELECTRON

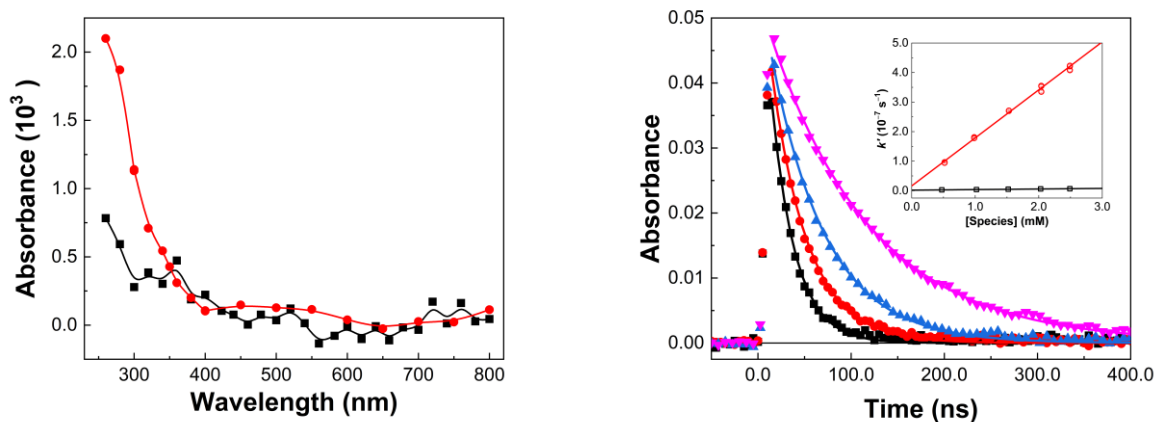

**Fig. S1.** Transient absorption spectra for  $e_{aq}^-$  reaction in Ar-saturated 2.49 mM DAG (■) and 2.49 mM 1:1 [DAG:ReO<sub>4</sub>] (●) in 10 mM phosphate buffered pH 6.95 solution containing 0.50 M t-butanol at 22.4 ± 0.1 °C. Data obtained from final limiting absorbance values fitted using single-exponential fit to measured kinetics. **(B)** Transient kinetics measured at 720 nm for Ar-saturated 2.49 mM (■), 1.53 mM (●), 0.98 mM (▲) and 0.52 mM (▼) 1:1 [DAG:ReO<sub>4</sub>]. Solid lines correspond to single-exponential fits, with fitted values of  $k' = (4.21 \pm 0.04), (2.70 \pm 0.02), (1.79 \pm 0.01),$  and  $(0.95 \pm 0.01) \times 10^7 \text{ s}^{-1}$ , respectively. *Inset:* Second-order rate coefficient determination for DAG (■) and [DAG:ReO<sub>4</sub>] (●) in the same respective solutions. The solid lines are weighted linear fits, corresponding to a second-order rate coefficient of  $k(e_{aq}^- + \text{DAG}) = (1.97 \pm 0.06) \times 10^8 \text{ M}^{-1} \text{ s}^{-1}$ , and  $k(e_{aq}^- + [\text{DAG:ReO}_4]) = (1.62 \pm 0.03) \times 10^{10} \text{ M}^{-1} \text{ s}^{-1}$ ,  $R^2 = 0.98$  and  $0.99$ , respectively.

## HYDROGEN ATOM

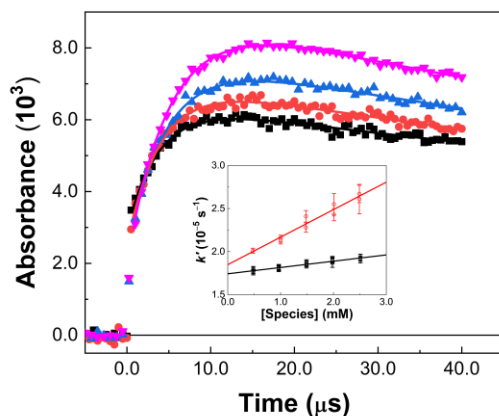

**Fig. S2.** Transient kinetics measured at 360 nm for  $\text{H}^\bullet$  atom reaction in  $\text{N}_2$ -saturated 2.49 (■), 1.48 (●), 1.00 (▲), and 0.48 (▼) mM 1:1 [DAG:ReO<sub>4</sub>] in 10 mM phosphate buffer, pH 3.06 solution containing 102.5  $\mu\text{M}$  pCBA at  $22.7 \pm 0.1$  °C. Solid lines correspond to exponential growth and decay function fits, with fitted growth values of  $k' = (2.67 \pm 0.10)$ ,  $(2.41 \pm 0.07)$ ,  $(2.15 \pm 0.04)$ , and  $(2.01 \pm 0.03) \times 10^5 \text{ s}^{-1}$ , respectively. *Inset:* Second-order rate coefficient determination for DAG (■) and [DAG:ReO<sub>4</sub>] (●) in the same respective solutions. The solid lines are weighted linear fits, corresponding to a second-order rate coefficient of  $k(\text{H}^\bullet + \text{DAG}) = (7.25 \pm 0.23) \times 10^6 \text{ M}^{-1} \text{ s}^{-1}$  and  $k(\text{H}^\bullet + [\text{DAG:ReO}_4]) = (3.19 \pm 0.23) \times 10^7 \text{ M}^{-1} \text{ s}^{-1}$ ,  $R^2 = 0.94$  and  $0.96$ , respectively.

## NITRATE RADICAL

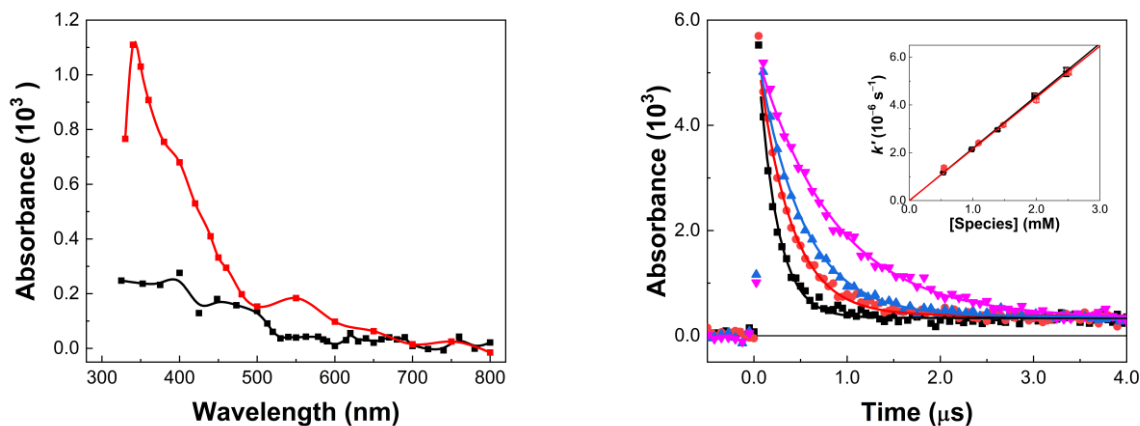

**Fig. S3.** (A) Transient absorption spectra for  $\text{NO}_3^\bullet$  radical reaction in  $\text{N}_2\text{O}$ -saturated 2.47 mM DAG (■) and 2.51 mM 1:1 [DAG:ReO<sub>4</sub>] (●) at pH 3.02 in 5.0 M  $\text{NaNO}_3$ /1.0 mM  $\text{HClO}_4$  at  $22.8 \pm 0.1$  °C. Data obtained from final limiting absorbance values fitted using single-exponential fit to measured kinetics. (B) Transient kinetics measured at 640 nm for  $\text{N}_2\text{O}$ -saturated 2.47 (■), 1.39 (●), 0.98 (▲), and 0.54 (▼) mM DAG. Solid lines correspond to single-exponential fits, with fitted values of  $k' = (5.29 \pm 0.10)$ ,  $(2.96 \pm 0.04)$ ,  $(2.15 \pm 0.02)$ , and  $(1.15 \pm 0.01) \times 10^6 \text{ s}^{-1}$ , respectively. *Inset:* Second-order rate coefficient determination for DAG (■) and [DAG:ReO<sub>4</sub>] (●) in the same respective solutions. The solid lines are weighted linear fits, corresponding to a second-order rate coefficient of  $k(\text{NO}_3^\bullet + \text{DAG}) = (2.19 \pm 0.03) \times 10^9 \text{ M}^{-1} \text{ s}^{-1}$  and  $k(\text{NO}_3^\bullet + [\text{DAG:ReO}_4]) = (2.06 \pm 0.03) \times 10^9 \text{ M}^{-1} \text{ s}^{-1}$ ,  $R^2 = 0.99$  and  $0.99$ , respectively.

## NON-NORMALIZED DAG CONCENTRATIONS VS. ABSORBED GAMMA DOSE

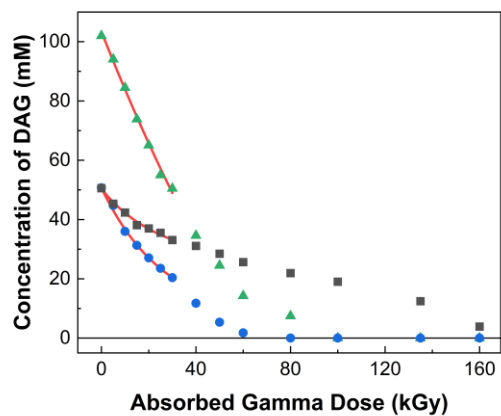

**Fig. S4.** Concentration of DAG as a function of absorbed dose from the gamma irradiation of formerly: 50 mM DAG in water (■); 50 mM DAG in 2.0 M HNO<sub>3</sub> (●); and 100 mM DAG in 2.0 M HNO<sub>3</sub>:1.5 M DEHiBA/*n*-dodecane (▲) under ambient irradiator temperature conditions. Solid lines are first-order exponential fits to data for dose constant calculation.
